# Supplementary material for: Cdon mutation and fetal alcohol converge on Nodal signaling in a mouse model of holoprosencephaly
Source: eLife. 2020 Sep 2;9:e60351. doi: 10.7554/eLife.60351 (PMC7467722; doi:10.7554/eLife.60351)
Supplement: Figure 5—figure supplement 1—source data 1. — Figure 5—figure supplement 1. [file elife-60351-fig5-figsupp1-data1.xlsx]

## Sheet: Sheet1
	Fold change
Lefty1	set 1	set 2	set 3	set 4	set 5	set 6	AVR	STD	p vs control
Control	0.960393	1.04124	1.18801	0.841746	1.1845	0.844237	1.01002	0.155795
60 mg/dL (13 mM)	0.408711	0.340734	1.54094	1.11141	1.73798	1.15314	1.04882	0.573244	0.876082
120 mg/dL (26 mM)	0.425164	0.657216	0.460166	0.694331	1.26133	1.20567	0.783979	0.364252	0.192466
240 mg/dl (52 mM)	0.313827	0.355812	1.03325	2.44351	0.87252	1.45595	1.07915	0.794633	0.838567
320 mg/dL (70 mM)	0.690855	0.957672	1.45853	1.39008	1.88872	1.95868	1.39076	0.500503	0.105575
Lefty2	set 1	set 2	set 3	set 4	set 5	set 6	AVR	STD	p vs control
Control	1.46246	0.683781	1.11774	0.894661	1.27092	0.786831	1.03607	0.299952
60 mg/dL (13 mM)	1.07848	1.17571	0.925156	1.00391	1.40586	1.43206	1.1702	0.20988	0.390568
120 mg/dL (26 mM)	0.322072	0.301867	1.51997	1.07779	1.05562	1.2111	0.914738	0.495467	0.619015
240 mg/dl (52 mM)	0.546415	0.801086	2.03108	4.94332	0.924238	1.15408	1.73337	1.65292	0.333244
320 mg/dL (70 mM)	0.372755	0.266852	3.90404	3.60666	1.57817	1.33325	1.84362	1.57062	0.24432
Hoxa1	set 1	set 2	set 3	set 4	set 5	set 6	AVR	STD	p vs control
Control	0.833694	1.19948	1	1	1.08026	0.925703	1.00652	0.125823
60 mg/dL (13 mM)	0.0703162	0.333373	0.484003	0.591341	1.37471	2.3727	0.871075	0.856382	0.709516
120 mg/dL (26 mM)	0.250816	2.83414	1.40888	0.731123	0.937855	5.08138	1.87403	1.80237	0.246436
240 mg/dl (52 mM)	2.20019	3.97751	40.3198	35.7927	107.34	56.0132	40.9406	38.8074	0.0303566
320 mg/dL (70 mM)	5.33064	2.43295	37.6488	47.4668	46.2002	70.064	34.8572	26.2988	0.0102831
Six1	set 1	set 2	set 3	set 4	set 5	set 6	AVR	STD	p vs control
Control	0.9873	1.01286	1.0396	0.961909	1.03801	0.963386	1.00051	0.0350121
60 mg/dL (13 mM)	1.46991	1.27853	1.19698	1.66549	1.72758	1.50335	1.47364	0.208229	0.000266016
120 mg/dL (26 mM)	2.84647	2.11049	2.85097	2.63911	2.41494	2.57883	2.57347	0.281198	8.94976e-08
240 mg/dl (52 mM)	1.53044	2.22491	0.902756	1.69739	1.53914	2.473	1.72794	0.55832	0.00973385
320 mg/dL (70 mM)	0.968316	0.77338	0.469587	1.45124	0.885877	0.864155	0.902092	0.319774	0.470872
Gbx2	set 1	set 2	set 3	set 4	set 5	set 6	AVR	STD	p vs control
Control	1.0831	0.923278	1.13144	0.88383	1.09617	0.912269	1.00501	0.10987
60 mg/dL (13 mM)	1.06989	0.852026	0.651121	0.610614	0.985861	1.00636	0.862647	0.193476	0.148106
120 mg/dL (26 mM)	0.643167	0.727773	0.785145	0.689561	0.709246	1.10005	0.775823	0.165522	0.0179801
240 mg/dl (52 mM)	0.352925	0.503802	0.25643	0.375089	0.266458	0.356702	0.351901	0.0894997	5.17643e-07
320 mg/dL (70 mM)	0.629939	0.222204	0.36196	0.473084	0.342974	0.402977	0.405523	0.137368	8.09282e-06
