# Supplementary material for: Cdon mutation and fetal alcohol converge on Nodal signaling in a mouse model of holoprosencephaly
Source: eLife. 2020 Sep 2;9:e60351. doi: 10.7554/eLife.60351 (PMC7467722; doi:10.7554/eLife.60351)
Supplement: Figure 5—source data 1. [file elife-60351-fig5-data1.xlsx]

## Sheet: Sheet1
pSmad2C/Smad2	Relative Density
EtOH	Set 3	set 2	set 1	AVR	STD	SEM	p value vs 0
0-1	0.517107	0.93351	1.30174	1.00002	0.362603	0.209349
0-2	1.48299	1.06653	0.698262
60-1	1.03843	0.882339	1.1129	0.914717	0.184575	0.106564	0.618717
60-2	0.607478	1.02396	0.823189
120-1	0.849801	0.123038	1.24402	0.653017	0.386651	0.223233	0.139901
120-2	0.557168	0.404245	0.739831
240-1	0.33007	0.28637	0.538253	0.483908	0.272091	0.157092	0.0191628
240-2	0.321392	0.419978	1.00739
320-1	0.0439148	0.0158096	0.0620161	0.0803873	0.0530159	0.0306088	0.000108744
320-1	0.168192	0.0944621	0.0979298
pJNK/JNK1	Relative Density
EtOH	Set 3	set 2	set 1	AVR	STD	SEM	p value vs 0
0-1	0.10397	0.00539066	0.00721156	0.0446525	0.0554823	0.0320327
0-2	0.127085	0.015202	0.00905593
60-1	0.379015	0.00411449	0.149386	0.173814	0.160017	0.0923859	0.0912993
60-2	0.359733	0.0395672	0.111066
120-1	0.137381	0.156216	0.0893895	0.165778	0.112636	0.0650307	0.0397501
120-2	0.0645726	0.165789	0.381322
240-1	0.734494	0.0612026	0.344038	0.365445	0.378064	0.218276	0.0667892
240-2	0.919495	0.0668406	0.0665991
320-1	1.31998	0.460012	0.412783	1.00001	0.543607	0.313852	0.0016048
320-1	0.680095	1.54013	1.58709
pSmad2L/Smad2	Relative Density
EtOH	set 1	set 2	set 3	AVR	STD	SEM	p value vs 0
0-1	0.133133	0.158458	0.0587283	0.132282	0.0568445	0.0328192
0-2	0.126605	0.224208	0.0925597
60-1	0.163302	0.129364	0.0692905	0.11261	0.0469372	0.0270992	0.528072
60-2	0.0937522	0.164376	0.0555731
120-1	0.10861	0.272878	0.0842962	0.203221	0.145257	0.0838642	0.291341
120-2	0.252584	0.438426	0.0625317
240-1	0.299311	0.940064	0.639472	0.607406	0.335735	0.193837	0.00657146
240-2	0.247037	1.06009	0.458459
320-1	1.10011	0.777962	0.292601	0.926291	0.466108	0.269107	0.00200547
320-1	0.899978	0.779589	1.7075
