# Supplementary material for: Cdon mutation and fetal alcohol converge on Nodal signaling in a mouse model of holoprosencephaly
Source: eLife. 2020 Sep 2;9:e60351. doi: 10.7554/eLife.60351 (PMC7467722; doi:10.7554/eLife.60351)
Supplement: Figure 5—source data 2. [file elife-60351-fig5-data2.xlsx]

## Sheet: Genes
	Fold change
Nanog	set 1	set 2	set 3	set 4	set 5	set 6	AVR	STD	p vs control
Control	1.05166	0.950879	0.958449	1.04335	1.21191	0.825141	1.0069	0.129526
60 mg/dL (13 mM)	0.527402	0.61641	0.783008	0.682645	0.878136	1.04179	0.754898	0.186782	0.0217204
120 mg/dL (26 mM)	0.320567	0.307466	0.261601	0.338476	0.45853	0.403033	0.348279	0.0709874	7.04024e-07
240 mg/dl (52 mM)	0.244918	0.346226	0.391152	0.441709	0.384085	0.380621	0.364785	0.0662544	7.74439e-07
320 mg/dL (70 mM)	0.469141	0.325021	0.410516	0.496975	0.394506	0.189772	0.380988	0.111332	4.23659e-06
Nodal	set 1	set 2	set 3	set 4	set 5	set 6	AVR	STD	p vs control
Control	1.1006	0.908596	1.05418	0.948601	1.11055	0.900456	1.00383	0.0960151
60 mg/dL (13 mM)	0.516504	0.625352	0.85947	0.620293	1.87269	2.17155	1.11098	0.720872	0.725689
120 mg/dL (26 mM)	1.46265	1.47812	1.39778	1.46701	1.67	2.24609	1.62027	0.320052	0.00111018
240 mg/dl (52 mM)	0.215333	0.309507	0.329994	0.375166	0.44792	0.607189	0.380852	0.134783	3.3245e-06
320 mg/dL (70 mM)	0.418824	0.509528	0.50037	0.767205	0.274591	0.356177	0.471116	0.17004	5.48426e-05
Pou5f1	set 1	set 2	set 3	set 4	set 5	set 6	AVR	STD	p vs control
Control	1.12204	0.891232	1.08857	0.91864	1.03232	0.968693	1.00358	0.0928824
60 mg/dL (13 mM)	0.410608	0.548538	1.04541	1.51076	1.34981	1.25052	1.01927	0.446551	0.934504
120 mg/dL (26 mM)	0.976336	0.651691	2.26892	1.94609	0.706141	0.710549	1.20995	0.711726	0.49733
240 mg/dl (52 mM)	0.113366	0.222566	2.29926	4.3058	0.662792	0.783173	1.39783	1.62592	0.566367
320 mg/dL (70 mM)	0.323827	0.256999	2.88563	2.47521	0.19081	0.189772	1.05371	1.26768	0.924955
Sox2	set 1	set 2	set 3	set 4	set 5	set 6	AVR	STD	p vs control
Control	1.2489	0.800705	1.21389	0.823799	1.03244	0.968575	1.01472	0.189317
60 mg/dL (13 mM)	0.500855	0.998658	0.845472	0.598488	1.41373	1.33888	0.949348	0.375462	0.711315
120 mg/dL (26 mM)	1.29217	1.0382	0.85005	0.878167	0.96845	1.2058	1.0388	0.178023	0.824975
240 mg/dl (52 mM)	0.886622	2.24705	0.304274	0.378628	0.252108	0.353799	0.73708	0.774632	0.413713
320 mg/dL (70 mM)	1.85178	1.24022	0.479682	0.483759	0.598019	0.558987	0.86874	0.560923	0.559297
T	set 1	set 2	set 3	set 4	set 5	set 6	AVR	STD	p vs control
Control	1.0529	0.949762	0.881358	1.13461	1.18218	0.845898	1.00778	0.137179
60 mg/dL (13 mM)	1.08743	1.06635	1.24803	1.22945	1.62364	1.48842	1.29055	0.222335	0.0242607
120 mg/dL (26 mM)	1.41486	1.17488	1.20151	1.0657	1.08796	1.51867	1.24393	0.182955	0.0298934
240 mg/dl (52 mM)	0.149996	0.153969	0.108564	0.114213	0.23092	0.328482	0.181024	0.0844303	1.88276e-07
320 mg/dL (70 mM)	0.203081	0.222945	0.125783	0.138922	0.269037	0.250518	0.201714	0.058438	1.15128e-07
Fgf5	set 1	set 2	set 3	set 4	set 5	set 6	AVR	STD	p vs control
Control	0.8411	1.18892	1.04195	0.959736	1.03817	0.963237	1.00552	0.115712
60 mg/dL (13 mM)	0.616628	0.738	1.17641	1.03629	1.02115	1.05996	0.941405	0.215173	0.534809
120 mg/dL (26 mM)	0.26595	0.257963	0.427754	0.622581	0.363821	0.311994	0.37501	0.136941	6.12324e-06
240 mg/dl (52 mM)	0.289004	0.352207	0.577599	0.542391	0.411667	0.407236	0.430017	0.110637	5.03474e-06
320 mg/dL (70 mM)	0.263378	0.22927	0.532039	0.741938	0.309944	0.299573	0.396024	0.200135	7.27336e-05
Hoxa1	set 1	set 2	set 3	set 4	set 5	set 6	AVR	STD	p vs control
Control	0.833694	1.19948	1	1	1.08026	0.925703	1.00652	0.125823
60 mg/dL (13 mM)	0.0703162	0.333373	0.484003	0.591341	1.37471	2.3727	0.871075	0.856382	0.709516
120 mg/dL (26 mM)	0.250816	2.83414	1.40888	0.731123	0.937855	5.08138	1.87403	1.80237	0.246436
240 mg/dl (52 mM)	2.20019	3.97751	40.3198	35.7927	107.34	56.0132	40.9406	38.8074	0.0303566
320 mg/dL (70 mM)	5.33064	2.43295	37.6488	47.4668	46.2002	70.064	34.8572	26.2988	0.0102831
