# Supplementary material for: Cdon mutation and fetal alcohol converge on Nodal signaling in a mouse model of holoprosencephaly
Source: eLife. 2020 Sep 2;9:e60351. doi: 10.7554/eLife.60351 (PMC7467722; doi:10.7554/eLife.60351)
Supplement: Figure 7—source data 1. [file elife-60351-fig7-data1.xlsx]

## Sheet: Sheet1
Fc pull down and AP assay	Fc fusion	AP fusion	Abs405 Before Fc pull down	umol/min	AVR	STD	SEM	p-value vs CD164
14-0614	CDON	CD164	2.0582	0	0.010123	0.0137084	0.00433496
14-0614	CDON	CD164	2.14625	0.01325
14-0616	CDON	CD164	1.47	0.01696
14-0619	CDON	CD164	2.0816	0.0318
14-0624	CDON	CD164	2	0
14-0630	CDON	CD164	0.4173	0.00424
14-0708	CDON	CD164	0.251	0
14-0723	CDON	CD164	0.1724	0
14-0910	CDON	CD164	0.7765	0.03498
14-0919	CDON	CD164	0.7118	0
14-0616	CDON	SHH-N	1.235	1.59	1.844	0.961492	0.480746	0.0316822
14-0619	CDON	SHH-N	1.2	2.0246
14-0624	CDON	SHH-N	1.9	3.0369
14-0630	CDON	SHH-N	0.3066	0.72451
14-0616	CDON	ALK4	1.445	0.424	0.172462	0.159787	0.0714588	0.0854659
14-0619	CDON	ALK4	0.6396	0.0265
14-0624	CDON	ALK4	2	0.04134
14-0630	CDON	ALK4	0.473	0.18921
14-0915	CDON	ALK4	0.7203	0.18126
14-0614	CDON	AcvRIIA	2.2343	0.09381	0.088722	0.0762165	0.0340851	0.0819979
14-0616	CDON	AcvRIIA	1.95	0.04346
14-0619	CDON	AcvRIIA	1.395	0.01378
14-0624	CDON	AcvRIIA	2.2	0.0795
14-0915	CDON	AcvRIIA	2.07	0.21306
14-0616	CDON	AcvRIIB	1.17	0.17278	0.225992	0.105608	0.0472294	0.010006
14-0619	CDON	AcvRIIB	1.71	0.23532
14-0624	CDON	AcvRIIB	2	0.1537
14-0630	CDON	AcvRIIB	0.38105	0.16218
14-0915	CDON	AcvRIIB	0.9529	0.40598
14-0614	CDON	TDGF1	1.47835	0.69006	1.40787	0.840809	0.253513	0.000256629
14-0614	CDON	TDGF1	1.8363	0.80613
14-0616	CDON	TDGF1	0.559	1.1236
14-0708	CDON	TDGF1	0.68	3.29236
14-0723	CDON	TDGF1	0.4371	2.19102
14-0619	CDON	TDGF1	0.37	0.9593
14-0624	CDON	TDGF1	0.62	0.6095
14-0630	CDON	TDGF1	0.6788	0.77645
14-0915	CDON	TDGF1	0.8103	2.09774
14-0910	CDON	TDGF1	0.8734	1.80624
14-0919	CDON	TDGF1	0.4025	1.1342
