# Supplementary material for: Cdon mutation and fetal alcohol converge on Nodal signaling in a mouse model of holoprosencephaly
Source: eLife. 2020 Sep 2;9:e60351. doi: 10.7554/eLife.60351 (PMC7467722; doi:10.7554/eLife.60351)
Supplement: Figure 7—source data 2. [file elife-60351-fig7-data2.xlsx]

## Sheet: Sheet1
		umol/min
AP	Fc	set 1	set 2	set 3	AVR	STD	SEM	p vs CD164
CD164-AP	Cdon	0.02968	0.02862	0.05936	0.03922	0.0174498	0.0100746
	LRP2 s1	0.0689	0.04134	0.10812	0.0727867	0.0335592	0.0193754
	s2	0.0901	0.02544	0.13886	0.0848	0.0568954	0.0328486
	s3	0.10918	0.02438	0.09434	0.0759667	0.0452874	0.0261467
	s4	0.12826	0.04346	0.06466	0.0787933	0.0441313	0.0254792
SHHN-AP	Cdon	1.34938	2.25886	1.46492	1.69105	0.495117	0.285856	0.00446445
	LRP2 s1	2.4804	3.79056	3.07294	3.11463	0.656074	0.378785	0.00131135
	s2	4.32374	5.95826	4.46896	4.91699	0.904688	0.522322	0.000764779
	s3	2.31822	3.19802	1.80836	2.44153	0.702989	0.405871	0.00434989
	s4	7.02144	12.1921	7.8599	9.02449	2.7751	1.6022	0.00504851
Cripto-AP	Cdon	1.74264	6.51052	3.7895	4.01422	2.39187	1.38095	0.0450864
	LRP2 s1	1.64512	13.7429	4.86858	6.7522	6.26499	3.61709	0.138535
	s2	1.16812	7.82068	6.84654	5.27845	3.59282	2.07431	0.066519
	s3	1.87302	8.6125	6.53702	5.67418	3.4516	1.99278	0.0483658
	s4	2.5334	7.06172	6.96844	5.52119	2.58792	1.49414	0.0219264
